# Supplementary material for: Radially resolved optical emission spectral imaging study of an atmospheric pressure μDBD jet for elucidating the effect of sample surface material on the underlying mechanisms
Source: Royal Society of Chemistry journal article supplement (doi:10.1039/d0ja00522c), 2021-01-01
Supplement: d0ja00522c1.pdf [file d0ja00522c1.pdf]

## Supplementary Information

# **Radially Resolved Optical Emission Spectral Imaging Diagnostics of Atmospheric Pressure $\mu$ DBD Jet for Direct Surface Solid Sampling Analysis**

Songyue Shi, Kevin Finch, and Gerardo Gamez\*

Texas Tech University, Department of Chemistry and Biochemistry, Lubbock, TX 79409-41061, USA. E-mail: [Gerardo.gamez@ttu.edu](mailto:Gerardo.gamez@ttu.edu)

## Section 1

The schematic and concept of push-broom hyperspectral imaging system used in the lab.

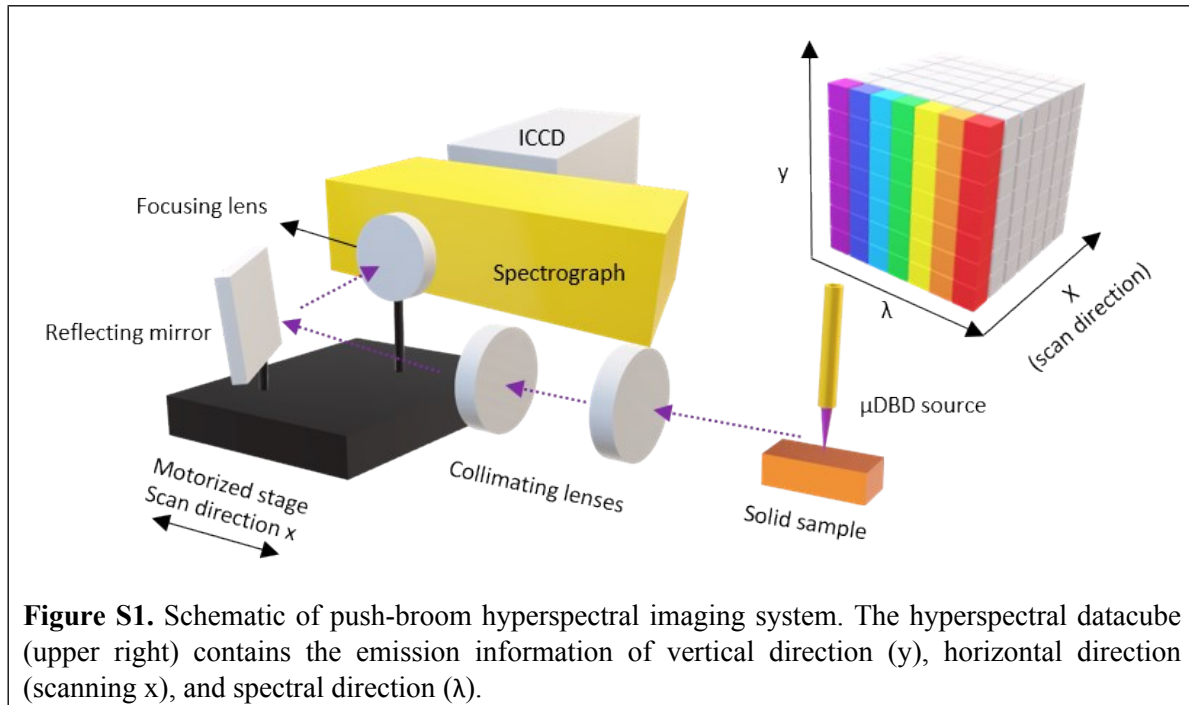

**Figure S1.** Schematic of push-broom hyperspectral imaging system. The hyperspectral datacube (upper right) contains the emission information of vertical direction (y), horizontal direction (scanning x), and spectral direction ( $\lambda$ ).

## Section 2

The LIFBASE software is used to simulate and determine the rotational temperature based on the  $\text{N}_2^+$  first negative system. The best fitted temperature is determined by the least Chi-square value ( $\chi^2$ ) between the experimental spectra data and the simulated model data.

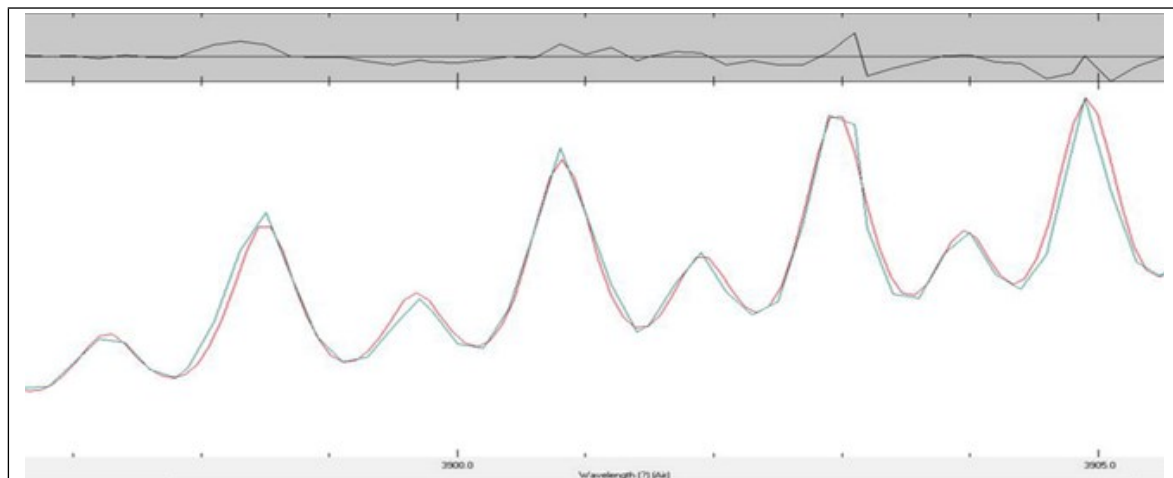

**Figure S2.** Comparison of experimental spectra of  $\text{N}_2^+$  first negative system (blue) and the simulated spectra by LIFBASE (red). The total resolution is 0.7664 nm (instrumental + broadening), the pressure is 760 Torr in Air, and the line shape is Voigt with 15% Lorentzian. The shaded area represents the difference profile between the experimental and simulated spectra.

### Section 3

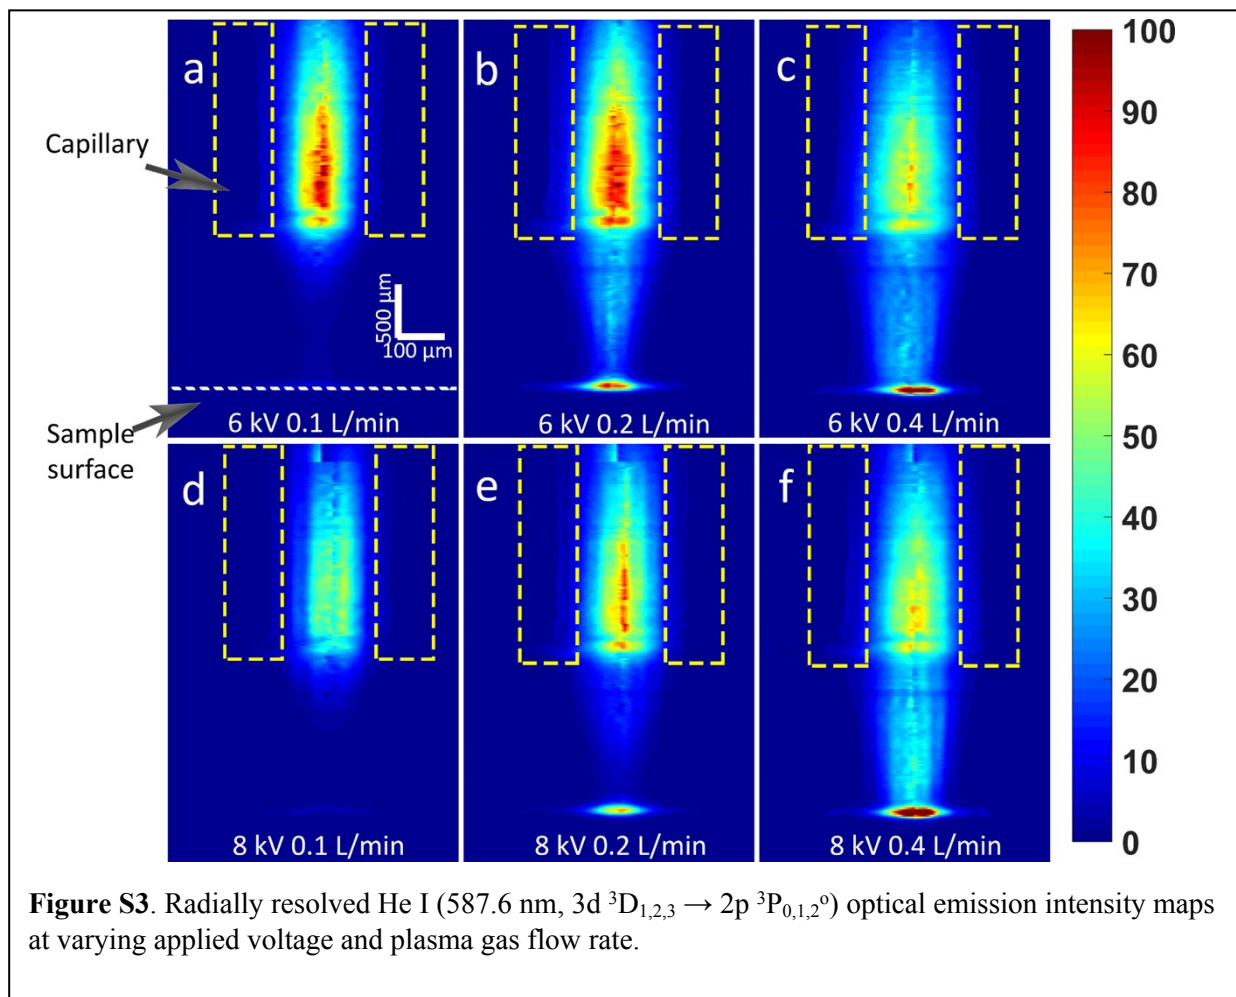

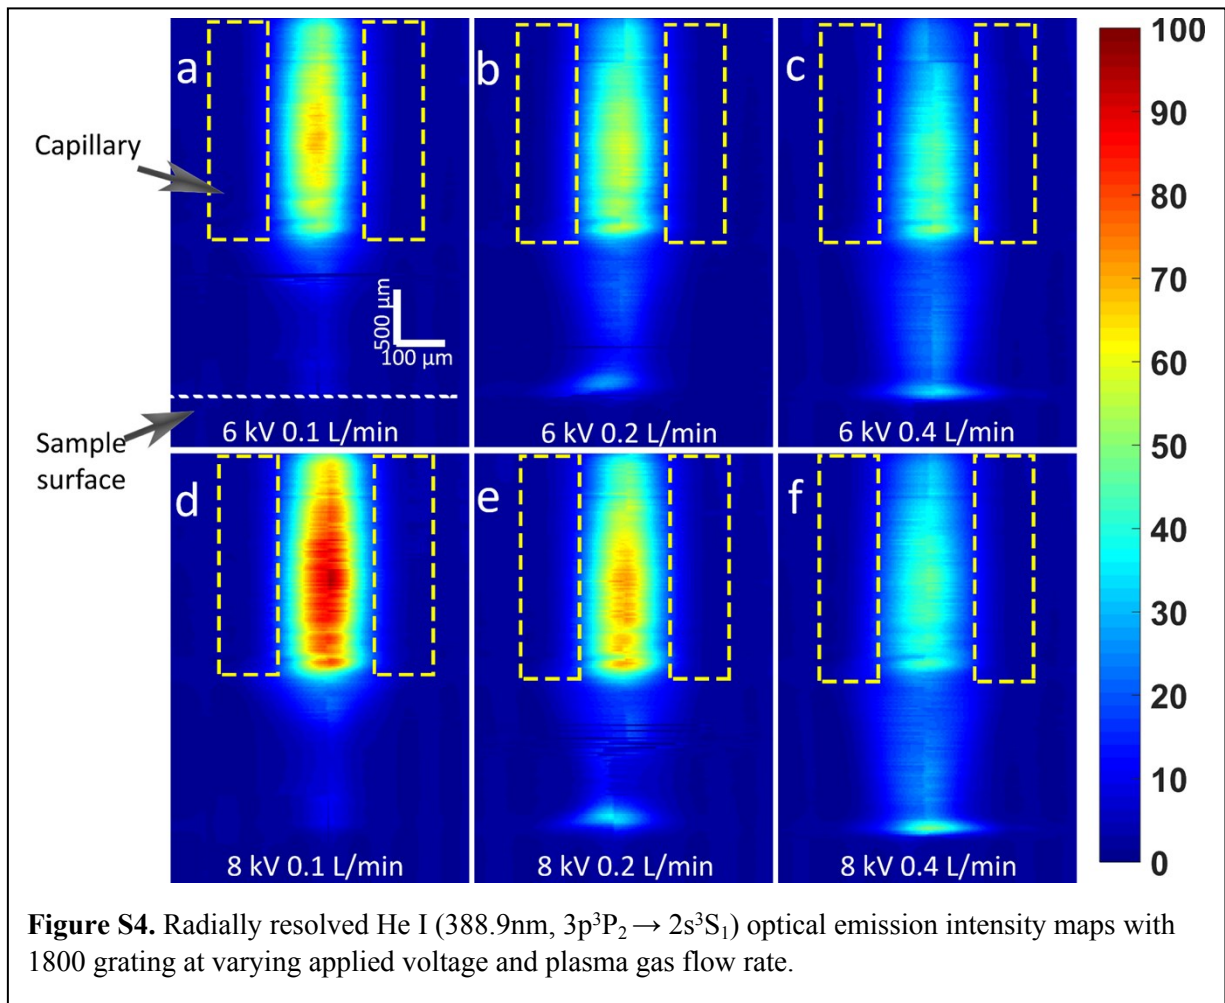

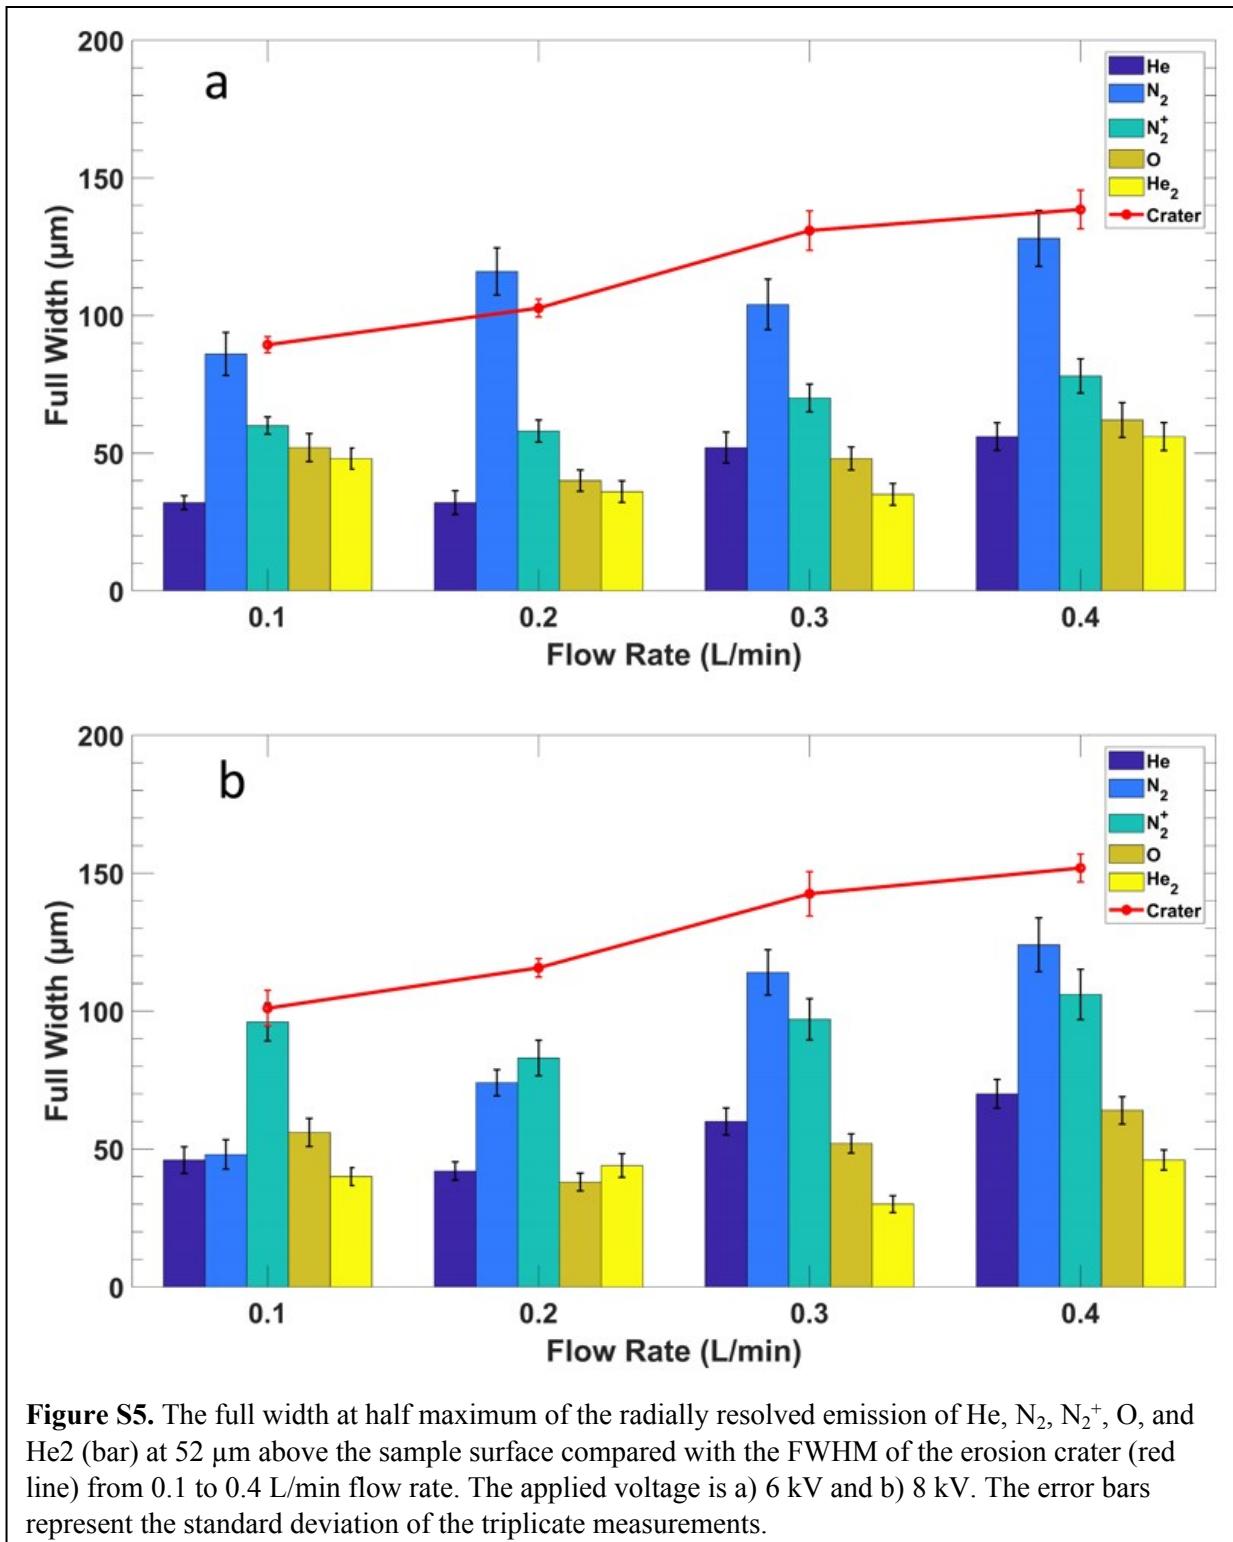

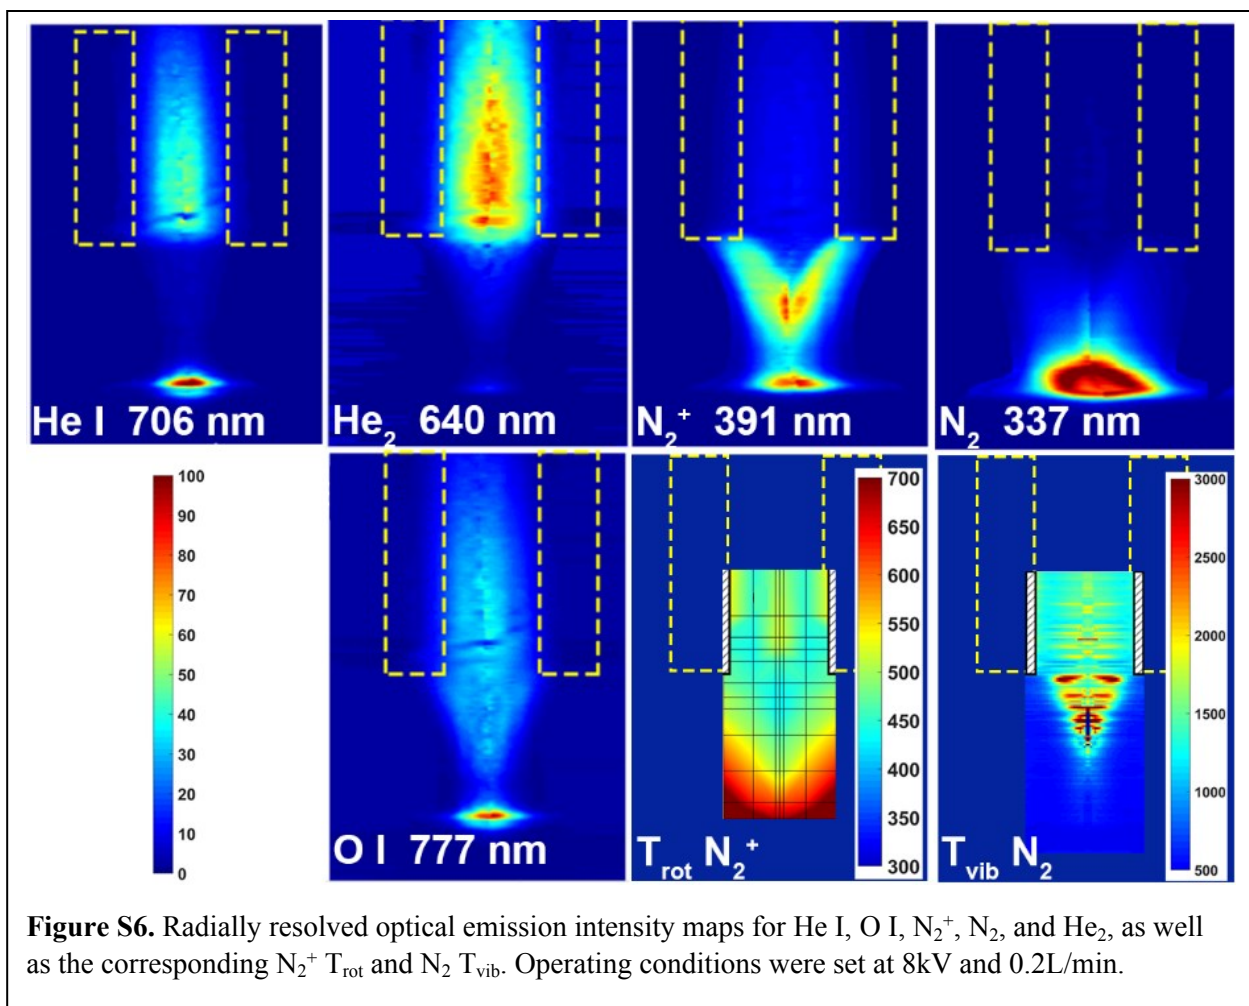

**Figure S6.** Radially resolved optical emission intensity maps for He I, O I, N<sub>2</sub><sup>+</sup>, N<sub>2</sub>, and He<sub>2</sub>, as well as the corresponding N<sub>2</sub><sup>+</sup> T<sub>rot</sub> and N<sub>2</sub> T<sub>vib</sub>. Operating conditions were set at 8kV and 0.2L/min.

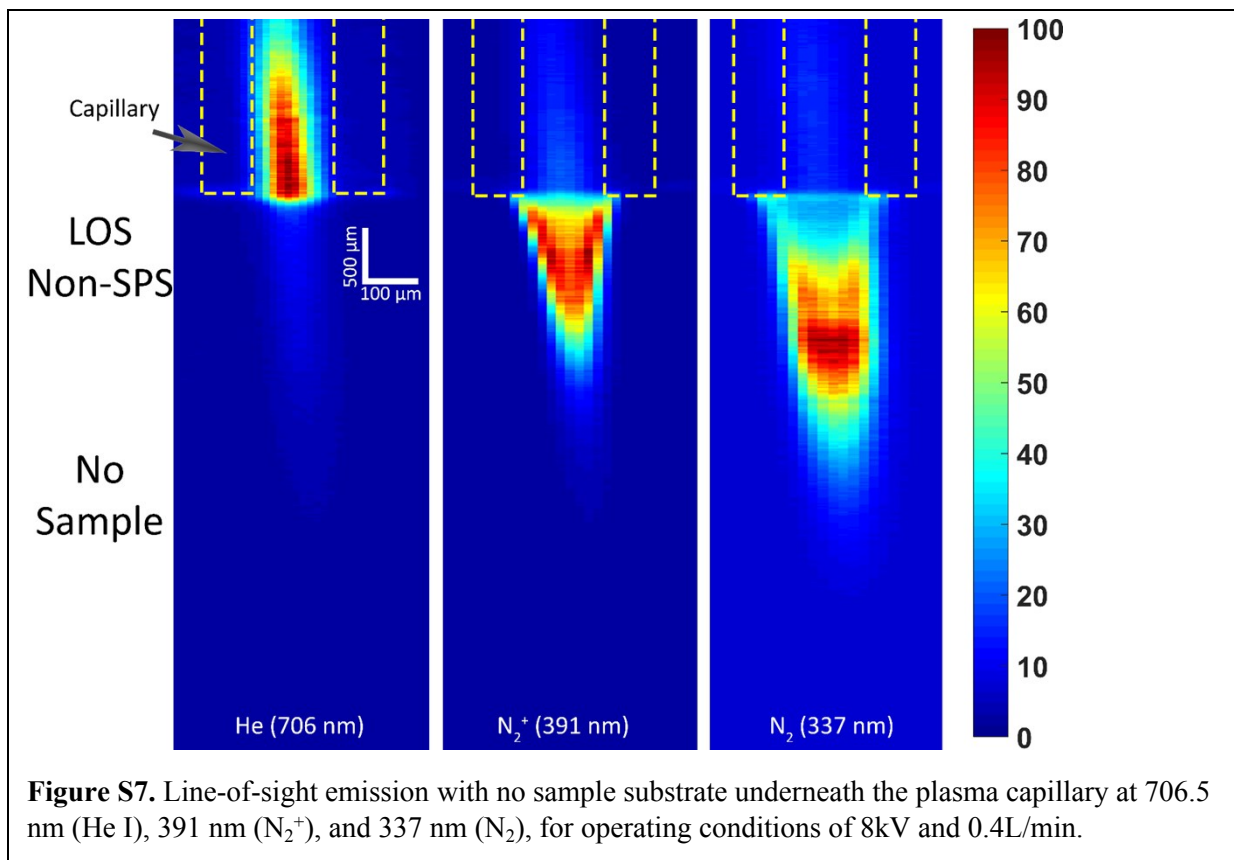

**Figure S7.** Line-of-sight emission with no sample substrate underneath the plasma capillary at 706.5 nm (He I), 391 nm ( $\text{N}_2^+$ ), and 337 nm ( $\text{N}_2$ ), for operating conditions of 8kV and 0.4L/min.
